# Supplementary material
Source: PubMed Central journal article supplement (PMC4649237)
Supplement: AAC.00515-15_zac001164665so1.pdf [file AAC.00515-15_zac001164665so1.pdf]

## Supplementary Legends

**Supplementary Table 1.** Primers used in this study.

## Supplementary Figure Legends

**Supplementary Figure 1. NaxD is conserved in numerous Gram-negative bacterial pathogens.** (A) Protein BLAST analysis was used to determine the % identity and % similarity of NaxD homologs in the indicated species. (B) Amino acids surrounding YdjC superfamily putative active site residues are shown and numbers indicate their position in the sequence.

Conserved residues (\*)

**Supplementary Figure 2.** Alignment of the 17 bp putative PmrA binding site in the promoter of *A. baumannii naxD*, with promoter regions of *A. baumannii pmrCAB*, *S. typhimurium pmrF* and *pmrCAB*. Consensus sequence of PmrA binding site are marked in bold and underlined. Y=C/T; K=G/T

**Supplementary Table 1.** Primers used in this study.

| <b>Primer Name</b>            | <b>Sequence</b>                                  |
|-------------------------------|--------------------------------------------------|
| <b>qRT-PCR</b>                |                                                  |
| qRT 2623 F2                   | accgatcaatacccctcatt                             |
| qRT 2623 R2                   | gttcgccataattggcagt                              |
| 16S rRNA 1                    | cagctcgtgtcgtgagatgt                             |
| 16S rRNA 2                    | cgtaagggccatgatgactt                             |
| <b><i>naxD</i> deletion</b>   |                                                  |
| A1S2623 f1                    | aatacttattggctactgcc                             |
| A1S2623 a1K R                 | ccgcatctccagcagccgatctaaattccacataggg            |
| A1S2623 a1K F                 | ccctatgggtggaatttagatcggctgctggagatggcgg         |
| A1S2623 Ka2 R                 | tggaacaacgcaggataaaattagaaaaactcatcgagca         |
| A1S2623 Ka2 F                 | tgctcgatgagtttttctaattttatcctgcggtgttcca         |
| A1S2623 r1                    | atagatgtcagaacaattgc                             |
| <b><i>naxD</i> complement</b> |                                                  |
| pWH1266 2623comp F2           | cgaccacaccgctcctgtggatccactatttataggctaatacaagtg |
| pWH1266 2623comp R2           | gaaggctctcaagggcatcggtcgactcattgcattgccctagtctgg |

**A**

| Organism                       | % Identity | % Similarity |
|--------------------------------|------------|--------------|
| <i>Acinetobacter baumannii</i> | 100        | 100          |
| <i>Francisella tularensis</i>  | 50         | 32           |
| <i>Legionella pneumophila</i>  | 37         | 53           |
| <i>Brucella abortus</i>        | 36         | 48           |
| <i>Coxiella burnetii</i>       | 34         | 52           |

**B**

|                       |   |           |    |         |            |    |       |                  |     |
|-----------------------|---|-----------|----|---------|------------|----|-------|------------------|-----|
|                       |   | ***       |    | * * *** |            | ** | ***** | * *              |     |
| <i>A. baumannii</i>   | 4 | VCYCADDFA | 12 | 58      | IGLHLNLTHA | 67 | 115   | QPDFIDGHQHIHQFP  | 129 |
| <i>F. tularensis</i>  | 5 | IIICADDFG | 13 | 60      | VGIHLNLTEG | 69 | 120   | LPDFIDGHQHVHHFP  | 134 |
| <i>L. pneumophila</i> | 7 | IFLCADDFG | 15 | 61      | TGLHFNLTEG | 70 | 119   | LPDFIDGHQHIHQFP  | 133 |
| <i>B. abortus</i>     | 1 | MMRIADDFG | 9  | 56      | VGLHLNLTQA | 65 | 114   | LPDYDGHQHCFCFP   | 128 |
| <i>C. burnetii</i>    | 4 | ITLCADDYG | 12 | 58      | IGLHFNLTEG | 67 | 115   | LPDFIDGHQHVHHL P | 129 |

PmrA consensus binding site

*naxDA. baumannii*

*pmrCAB A. baumannii*

*pmrFS. typhimurium*

*pmrCAB S. typhimurium*

|                           |           |                           |
|---------------------------|-----------|---------------------------|
| <b>Y T T A A K</b>        | N N N N N | <b>Y T T A A K</b>        |
| <b><u>C T T A A G</u></b> | A A A A C | <b><u>T T T A A G</u></b> |
| <b><u>T T T A A G</u></b> | T C A T T | <b><u>T T T A A G</u></b> |
| <b><u>C T T A A T</u></b> | G T T A A | <b><u>T T T A A T</u></b> |
| <b><u>C T T A A G</u></b> | G T T C A | <b><u>C T T A A T</u></b> |
